# Supplementary material for: Conductive TiN network-assisted fast-charging of lithium-ion batteries
Source: Royal Society of Chemistry journal article supplement (doi:10.1039/d4ta06987k), 2024-12-05
Supplement: d4ta06987k1.pdf [file d4ta06987k1.pdf]

## *Supplementary Information*

### **Conductive TiN Network-Assisted Fast-Charging of Lithium-Ion Batteries**

Won Ung Jeong,<sup>a</sup> Hong Rim Shin,<sup>b</sup> Ilyoung Choi,<sup>c</sup> Jae Seok Jeong,<sup>a</sup> Joo Hyeong Suh,<sup>a</sup> Dong Ki Kim,<sup>a</sup> Youngguk Kim,<sup>c\*</sup> Jong-Won Lee,<sup>b,d\*</sup> Min-Sik Park<sup>a\*</sup>

<sup>a</sup> Department of Advanced Materials Engineering for Information and Electronics, Integrated Education Institute for Frontier Science & Technology (BK21 Four), Kyung Hee University, 1732 Deogyong-daero, Giheung-gu, Yongin 17104, Republic of Korea

<sup>b</sup> Division of Materials Science and Engineering, Hanyang University, 222 Wangsimni-ro, Seongdong-gu, 04763 Seoul, Republic of Korea

<sup>c</sup> Samsung SDI Co., Ltd. R&D Center, Suwon 16678, Republic of Korea

<sup>d</sup> Department of Battery Engineering, Hanyang University, 222 Wangsimni-ro, Seongdong-gu, 04763 Seoul, Republic of Korea

\*Corresponding authors email address:

youngguk.kim@samsung.com (Y. Kim),

jongwonlee@hanyang.ac.kr (J.-W. Lee),

mspark@khu.ac.kr (M.-S. Park)

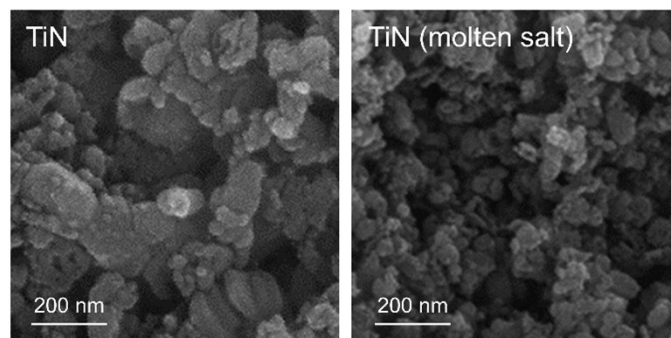

**Fig. S1.** FESEM images of (a) TiN nanoparticles, and (b) TiN nanoparticles synthesized with molten salt

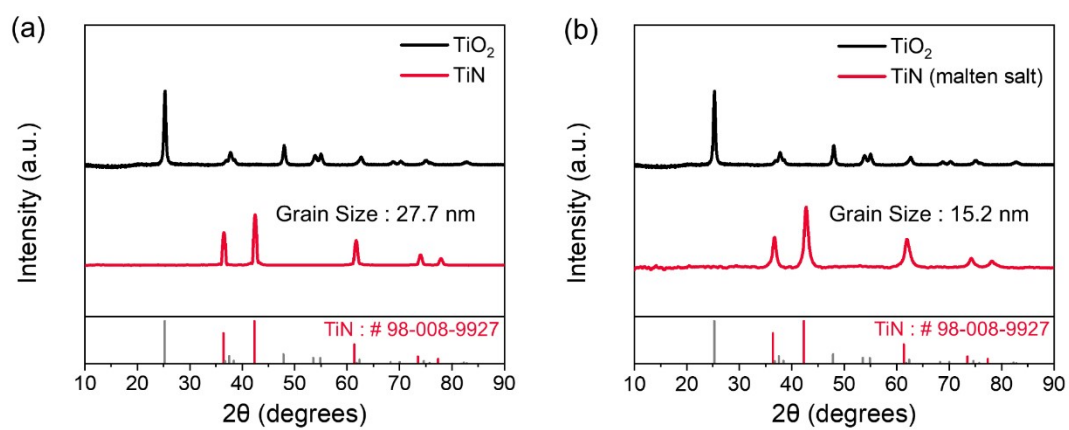

**Fig. S2.** Powder XRD patterns of TiN nanoparticles, and (b) TiN nanoparticles synthesized with molten salt

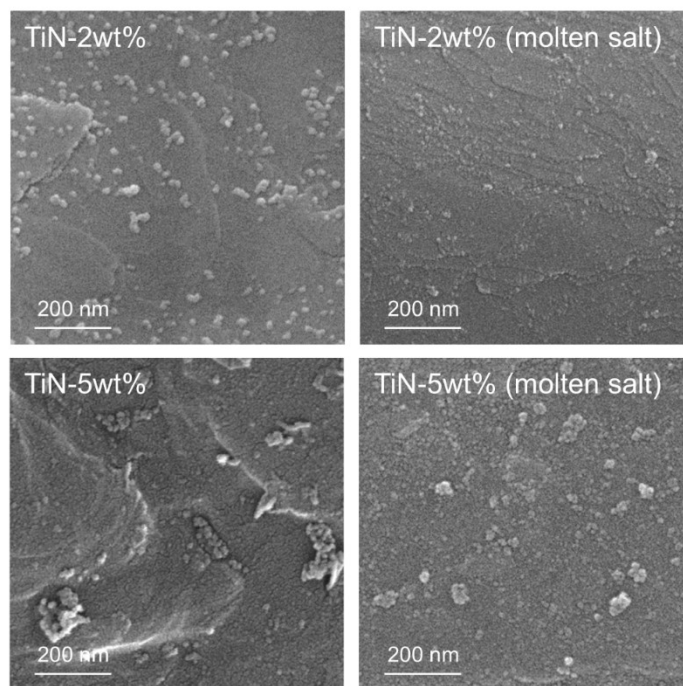

**Fig. S3.** FESEM images of TiN@AG 2wt%, TiN@AG 2wt% synthesized with molten salt, TiN@AG 5wt%, and TiN@AG 5wt% with molten salt.

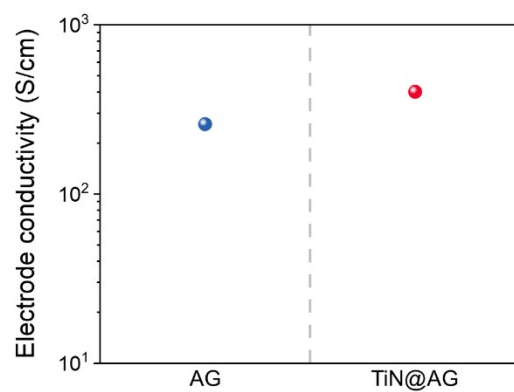

**Fig. S4.** Comparison of electrode conductivity of the AG and TiN@AG anodes.

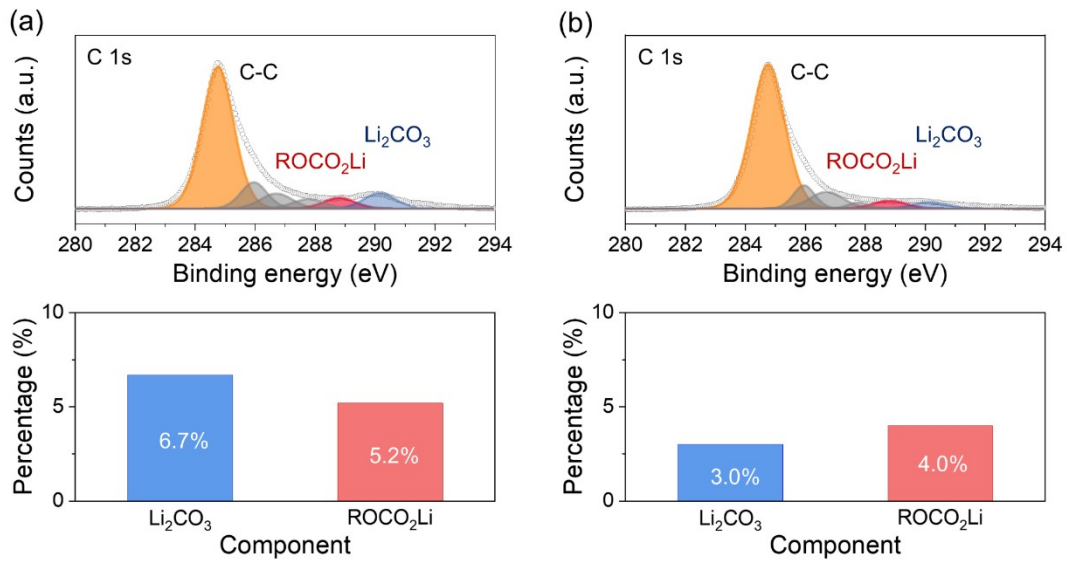

**Fig. S5.** C 1s XPS profiles and the fraction of  $\text{Li}_2\text{CO}_3$  and  $\text{ROCO}_2\text{Li}$  in the SEI component after 300th cycle of (c) AG and (d) TiN@AG

**Table S1.** Fitting results of the Nyquist plots using the equivalent circuit.

| Sample     | OCV                |                       | SOC 50%            |                        |                       | SOC 100%           |                        |                       |
|------------|--------------------|-----------------------|--------------------|------------------------|-----------------------|--------------------|------------------------|-----------------------|
|            | $R_b$ ( $\Omega$ ) | $R_{ct}$ ( $\Omega$ ) | $R_b$ ( $\Omega$ ) | $R_{SEI}$ ( $\Omega$ ) | $R_{ct}$ ( $\Omega$ ) | $R_b$ ( $\Omega$ ) | $R_{SEI}$ ( $\Omega$ ) | $R_{ct}$ ( $\Omega$ ) |
| AG         | 15.8               | 144.0                 | 4.5                | 3.6                    | 13.3                  | 1.1                | 3.8                    | 11.8                  |
| TiN@A<br>G | 2.5                | 36.3                  | 2.0                | 3.1                    | 12.9                  | 1.2                | 2.2                    | 3.6                   |

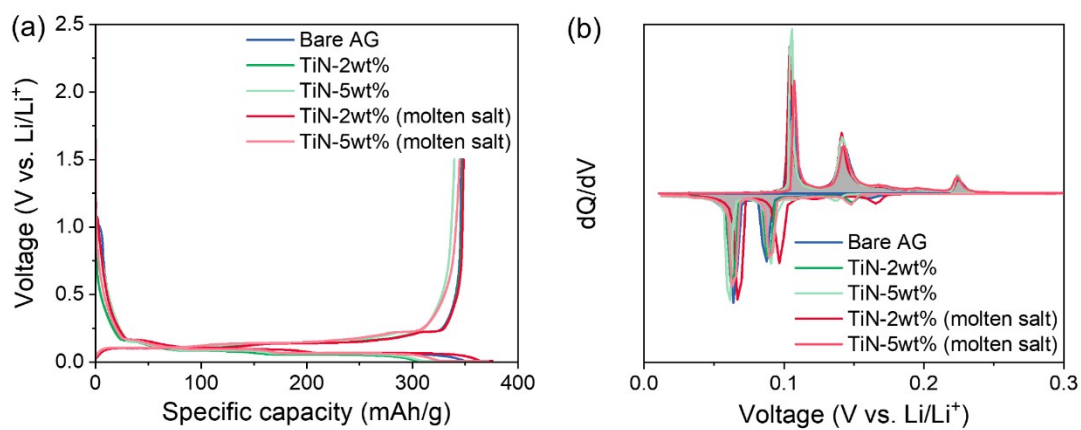

**Fig. S6.** Electrochemical performances of various anodes: (a) galvanostatic voltage profiles at 0.1C charging and 0.1C discharging, and (b) corresponding differential voltage profiles of the first cycle.



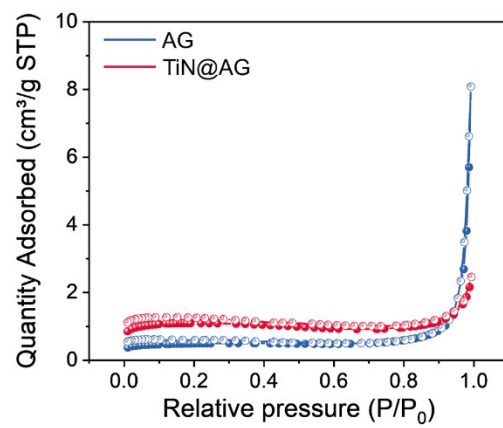

**Fig. S7.** N<sub>2</sub> adsorption-desorption isotherms of AG, and TiN@AG particles.
